# Supplementary material for: Theoretical study on photophysical properties of three high water solubility polypyridyl complexes for two-photon photodynamic therapy
Source: Royal Society of Chemistry journal article supplement (doi:10.1039/c8cp01069b), 2018-01-01
Supplement: c8cp01069b1.pdf [file c8cp01069b1.pdf]

## Supporting Information

**Theoretical study on photophysical properties of three high water solubility polypyridyl complexes for two-photon photodynamic therapy**

Ying-Tao Liu, Xue Yin, Xiao-Yong Lai and Xin Wang\*

*State Key Laboratory of High-efficiency Coal Utilization and Green Chemical Engineering, College of Chemistry and Chemical Engineering, Ningxia University, Yinchuan 750021, China*

*Email: wangxin@nxu.edu.cn*

**Table S-1. The absorption spectra of Ru-bpy were calculated by using different functionals.**

| Functionals       | $E$ (eV) | Wavelength (nm) | $f$    |
|-------------------|----------|-----------------|--------|
| M06-2X            | 2.41     | 514.9           | 0.0001 |
| TPSSh             | 2.43     | 511.1           | 0.0068 |
| B3LYP             | 2.72     | 455.4           | 0.0058 |
| PBE               | 2.90     | 426.8           | 0.0057 |
| $\omega$ B97-XD   | 2.96     | 418.8           | 0.0001 |
| LC- $\omega$ PBE  | 2.98     | 415.6           | 0.0057 |
| CAM-B3LYP         | 3.04     | 408.5           | 0.0001 |
| Exp. <sup>1</sup> |          | 464             |        |

1. H. Huang, B. Yu, P. Zhang, J. Huang, Y. Chen, G. Gasser, L. Ji and H. Chao, *Angewandte Chemie*, 2015, 127, 14255-14258.

**Table S-2. The absorption spectra of Ru-bpy were calculated in different solvents by using B3LYP functional.**

| Solvent            | States         | $E$ (eV) | $\lambda_{max}$ (nm) | $f$    | Main configurations | Exp. <sup>1</sup> (nm) |
|--------------------|----------------|----------|----------------------|--------|---------------------|------------------------|
| H <sub>2</sub> O   | S <sub>1</sub> | 2.72     | 455.4                | 0.0058 | HOMO→LUMO (99%)     | 464                    |
| Methanol           | S <sub>1</sub> | 2.72     | 455.4                | 0.0057 | HOMO→LUMO (99%)     | 463                    |
| CH <sub>3</sub> CN | S <sub>1</sub> | 2.72     | 455.4                | 0.0057 | HOMO→LUMO (99%)     |                        |

1. H. Huang, B. Yu, P. Zhang, J. Huang, Y. Chen, G. Gasser, L. Ji and H. Chao, *Angewandte Chemie*, 2015, 127, 14255-14258.

**Table S-3. The lowest vertical singlet excitation energies ( $E$  in eV), maximum one-photon absorption wavelengths ( $\lambda_{\text{OPA}}$  in nm), maximum two-photon absorption wavelengths ( $\lambda_{\text{TPA}}$  in nm), TPA cross-sections ( $\sigma_{\text{TPA}}$  in GM) of Ru-bpy were calculated by using different functionals and basis sets.**

|                   | $E$ (eV) | $\lambda_{\text{OPA}}$ (nm) | $\lambda_{\text{TPA}}$ (nm) | $\sigma_{\text{TPA}}$ (GM) |
|-------------------|----------|-----------------------------|-----------------------------|----------------------------|
| CAM-B3LYP/6-31G*  | 3.06     | 405.2                       | 810.4                       | 2.29E-02                   |
| B3LYP/6-31G*      | 2.68     | 462.7                       | 925.4                       | 2.22E-04                   |
| B3LYP/6-31+G*     | 2.65     | 467.9                       | 935.8                       | 2.18E-04                   |
| B3LYP/6-311+G*    | 2.62     | 473.3                       | 946.6                       | 6.31E-04                   |
| Exp. <sup>1</sup> |          |                             | ca.900                      |                            |

1. H. Huang, B. Yu, P. Zhang, J. Huang, Y. Chen, G. Gasser, L. Ji and H. Chao, *Angewandte Chemie*, 2015, 127, 14255-14258.

**Table S-4. Partial molecular orbital (MO) energies ( $E$  in eV) and compositions in  $S_0$  state of Ru-bpy, Zn-bpy and Zn-tpy in water solution. For Ru-bpy and Zn-bpy, the L1, L2 and L3 represent bipyridyl ligand. For Zn-tpy, the L1 and L2 represent terpyridyl ligand. Moreover, the M in the table represents the metal core.**

|        | MO     | $E$ (eV) | Main Contribution (%) |    |    |    | Assignment                       |
|--------|--------|----------|-----------------------|----|----|----|----------------------------------|
|        |        |          | M                     | L1 | L2 | L3 |                                  |
| Ru-bpy | LUMO+1 | -3.13    | 7                     | 61 | 13 | 19 | $d(\text{Ru})+\pi^*(\text{bpy})$ |
|        | LUMO   | -3.27    |                       | 33 | 33 | 32 | $\pi^*(\text{bpy})$              |
|        | HOMO   | -6.81    | 86                    |    |    |    | $\pi(\text{Ru})$                 |
|        | HOMO-1 | -6.91    | 80                    |    | 8  | 7  | $\pi(\text{Ru})+\pi(\text{bpy})$ |
| Zn-bpy | LUMO+1 | -3.12    |                       | 42 | 55 |    | $\pi^*(\text{bpy})$              |
|        | LUMO   | -3.12    |                       | 24 | 10 | 65 | $\pi^*(\text{bpy})$              |
|        | HOMO   | -7.71    |                       | 33 | 63 |    | $\pi(\text{bpy})$                |
|        | HOMO-1 | -7.72    |                       | 34 | 7  | 59 | $\pi(\text{bpy})$                |
| Zn-tpy | LUMO+1 | -3.28    |                       | 50 | 50 |    | $\pi^*(\text{tpy})$              |
|        | LUMO   | -3.31    |                       | 50 | 49 |    | $\pi^*(\text{tpy})$              |
|        | HOMO   | -7.59    |                       | 50 | 50 |    | $\pi(\text{tpy})$                |
|        | HOMO-1 | -7.59    |                       | 50 | 50 |    | $\pi(\text{tpy})$                |

**Table S-5. The lowest triplet excited energies ( $E$  in eV) and main configurations for Ru-bpy, Zn-bpy and Zn-tpy, calculated by using Gaussian program.**

| Molecule | States | $E$ (eV) | Main configurations | Assignment                    |
|----------|--------|----------|---------------------|-------------------------------|
| Ru-bpy   | $T_1$  | 2.50     | HOMO→LUMO (88%)     | $^3\text{MLCT}/^3\text{LLCT}$ |
| Zn-bpy   | $T_1$  | 2.95     | HOMO→LUMO (40%)     | $^3\text{LLCT}$               |
|          |        |          | HOMO-1→LUMO+1 (27%) | $^3\text{LLCT}$               |
|          |        |          | HOMO-2→LUMO+2 (20%) | $^3\text{LLCT}$               |
| Zn-tpy   | $T_1$  | 2.87     | HOMO→LUMO (95%)     | $^3\text{LLCT}$               |

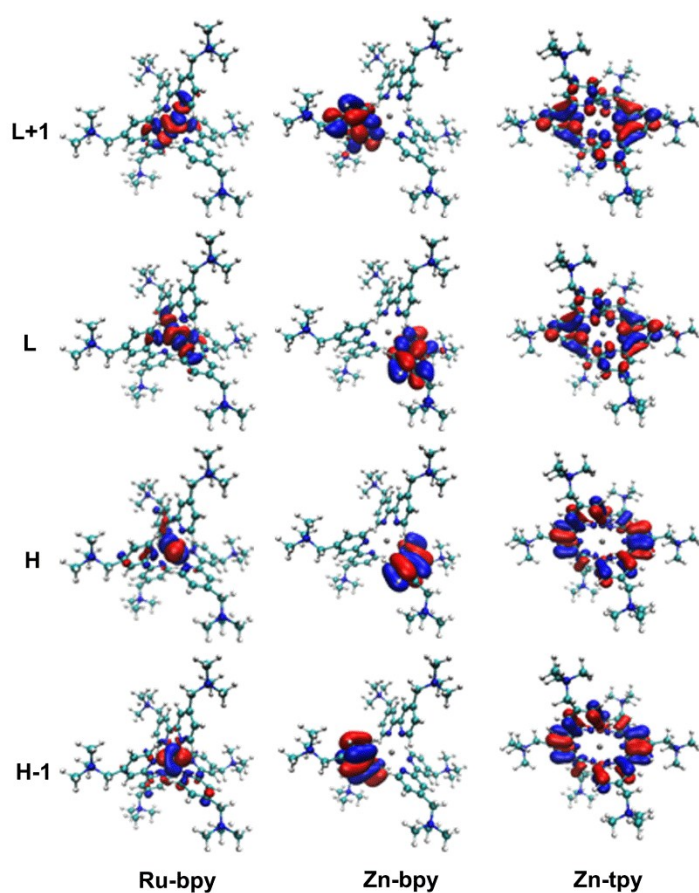

**Fig. S-1 Partial frontier molecular orbitals map of the three compounds in ground state, calculated by using CAM-B3LYP functional.**

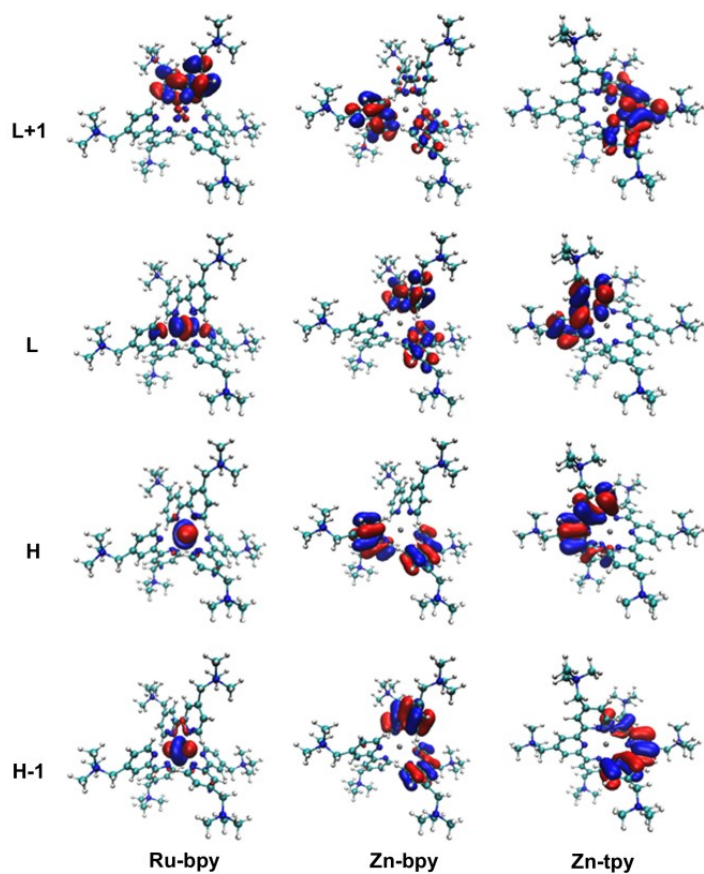

**Fig. S-2 Partial frontier molecular orbitals map of the three compounds in triplet excited state, calculated by using B3LYP functional.**
